# Supplementary material for: The AlAl triple bond in Al2X5+ and Al2X62+ (X = Li, Na) clusters with multiple alkali metal coordination
Source: Royal Society of Chemistry journal article supplement (doi:10.1039/d0nj04819d), 2020-01-01
Supplement: d0nj04819d1.pdf [file d0nj04819d1.pdf]

## SUPPLEMENTARY INFORMATION

### The Al≡Al triple bond in Al<sub>2</sub>X<sub>5</sub><sup>+</sup> and Al<sub>2</sub>X<sub>6</sub><sup>2+</sup> (X=Li, Na) clusters with multiple alkali metals coordination

Yingying Liu<sup>a</sup>, Changyan Zhu<sup>a</sup>, Chaoxia Wen<sup>a</sup>, Min Zhang<sup>\*a</sup>, Yun Geng<sup>a</sup>, Xingman Liu<sup>\*b</sup>,  
Zhongmin Su<sup>ac</sup>

*a* Institute of Functional Material Chemistry, Faculty of Chemistry & National & Local  
United Engineering Laboratory for Power Battery, Northeast Normal University, Changchun  
130024, P.R. China.

*b* College of Chemistry and Chemical Engineering, Ningxia University, Yinchuan 750021,  
China.

*c*. School of Chemistry and Environmental Engineering, Changchun University of Science  
and Technology, Changchun 130022, China.

E-mail: [mzhang@nenu.edu.cn](mailto:mzhang@nenu.edu.cn)  
[liuxm2020@nxu.edu.cn](mailto:liuxm2020@nxu.edu.cn)

## Table of Contents

**S4 Figure S1.** Optimized GEM structures together with important bond distances (in/Å) and WBIs of  $D_{4h}$ - $Al_2Li_4$  (a) and  $D_{4h}$ - $Al_2Na_4$  (b) at the CCSD/6-311G(d) level.

**S4 Figure S2.** The lowest-lying isomers of  $Al_2Li_5^+$ . Optimized structures at the B3LYP/def2-TZVP level, relative single-point energies (kcal/mol) at the CCSD/6-311G(d) level.

**S5 Figure S3.** The lowest-lying isomers of  $Al_2Li_6^{2+}$ . Optimized structures at the B3LYP/def2-TZVP level, relative single-point energies (kcal/mol) at the CCSD/6-311G(d) level.

**S6 Figure S4.** The lowest-lying isomers of  $Al_2Na_5^+$ . Optimized structures at the B3LYP/def2-TZVP level, relative single-point energies (kcal/mol) at the CCSD/6-311G(d) level.

**S7 Figure S5.** The lowest-lying isomers of  $Al_2Na_6^{2+}$ . Optimized structures at the B3LYP/def2-TZVP level, relative single-point energies (kcal/mol) at the CCSD/6-311G(d) level.

**S8 Table S1.** Important results information of the clusters, including the spin states, relative energies (kcal/mol), Al-Al bond length (R/Å), Wiberg Bond Indices ( $WBI_{Al-Al}$ ) and NPA charge (NPA/|e|). They all calculated at the B3LYP/def2-TZVP level.

**S9 Figure S6.** Optimized GEM structures at the CCSD/6-311G(d) level for  $C_1$ - $Al_2Li_5$  (a),  $C_1$ - $Al_2Li_6$  (b),  $C_1$ - $Al_2Na_5$  (c) and  $C_1$ - $Al_2Na_6$  (d). Together with important bond distances (in/Å) and Wiberg bond indices (WBIs) at the same level.

**S10 Figure S7.** The lowest-lying isomers of  $Al_2Li_5$ . Optimized structures at B3LYP/def2-TZVP level, relative energies (kcal/mol) at the CCSD/6-311G(d) level.

**S11 Figure S8.** The lowest-lying isomers of  $Al_2Li_6$ . Optimized structures at B3LYP/def2-TZVP level, relative single-point energies (kcal/mol) at the CCSD/6-311G(d) level.

**S12 Figure S9.** The lowest-lying isomers of  $Al_2Na_5$ . Optimized structures at B3LYP/def2-TZVP level, relative single-point energies (kcal/mol) at CCSD/6-311G(d) level.

**S13 Figure S10.** The lowest-lying isomers of  $Al_2Na_6$ . Optimized structures at B3LYP/def2-TZVP level, relative single-point energies (kcal/mol) at the CCSD/6-311G(d) level.

**S14 Table S2.** Important results information of the clusters, including the spin states, relative energies (kcal/mol), Al-Al bond length (R/Å), Wiberg Bond Indices ( $WBI_{Al-Al}$ ) and NPA charge (NPA/|e|). They all calculated at the B3LYP/def2-TZVP level.

**S15 Figure S11.** Root-mean-square deviations (RMSD) of  $Al_2Li_5^+$  (a),  $Al_2Li_6^{2+}$  (b),  $Al_2Na_5^+$  (c) and  $Al_2Na_6^{2+}$  (d) during Born-Oppenheimer molecular dynamics (BOMD) simulations at 298K. The initial and final structural snapshots are also shown here.

**S16 Figure S12.** The global minimum of  $C_{4v}$ - $Al_2Li_5^+$  (a),  $D_{4h}$ - $Al_2Li_6^{2+}$  (b) and  $D_{4h}$ - $Al_2Na_6^{2+}$  (c) and their important FMOs under the CCSD/6-311G(d) level.

**S17 Figure S13.** The dominant FMO correlation diagram in  $Al_2Na_6^{2+}$  between  $Al_2$  and  $Na_6^{2+}$  fragments calculated at the CCSD/6-311G(d) level. The horizontal dashed and solid lines represent virtual and occupied molecular orbitals, respectively. (the

orbital energies are also given, unit: eV).

**S17 Figure S14.** a) AdNDP orbitals. b) LOL profile. c) ELF profile for  $\text{Al}_2\text{Li}_5^+$  at the CCSD/6-311G(d) level. ON stands for the occupation number.

**S18 Figure S15.** a) AdNDP orbitals. b) LOL profile. c) ELF profile for  $\text{Al}_2\text{Li}_6^{2+}$  at the CCSD/6-311G(d) level. ON stands for the occupation number.

**S18 Figure S16.** a) AdNDP orbitals. b) LOL profile. c) ELF profile for  $\text{Al}_2\text{Na}_6^{2+}$  at the CCSD/6-311G(d) level. ON stands for the occupation number.

**S19 Figure S17.** Laplacian plot of the electron density  $\nabla^2\rho(r)$ , of  $\text{Al}_2\text{Li}_5^+$ (a),  $\text{Al}_2\text{Li}_6^{2+}$ (b),  $\text{Al}_2\text{Na}_6^{2+}$ (c) in different perspectives. Solid and dashed lines correspond to positive and negative regions of  $\nabla^2\rho$ , respectively.

**S20 Scheme 1.** Several potential reactions and thermodynamic values for the generation of  $C_1\text{-Al}_2\text{Li}_5$ ,  $C_{4v}\text{-Al}_2\text{Li}_5^+$ ,  $C_1\text{-Al}_2\text{Li}_6$ ,  $D_{4h}\text{-Al}_2\text{Li}_6^{2+}$ ,  $C_1\text{-Al}_2\text{Na}_5$ ,  $D_{3h}\text{-Al}_2\text{Na}_5^+$ ,  $C_1\text{-Al}_2\text{Na}_6$  and  $D_{4h}\text{-Al}_2\text{Na}_6^{2+}$ .

**S21 Table S3.** Cartesian coordinates for optimized structures of  $\text{Al}_2\text{Li}_5^+$ ,  $\text{Al}_2\text{Li}_6^{2+}$ ,  $\text{Al}_2\text{Na}_5^+$ , and  $\text{Al}_2\text{Na}_6^{2+}$  at the CCSD/6-311G(d) level.

**S22 Table S4.** Cartesian coordinates for optimized structures of  $\text{Al}_2\text{Li}_5$ ,  $\text{Al}_2\text{Li}_6$ ,  $\text{Al}_2\text{Na}_5$ , and  $\text{Al}_2\text{Na}_6$  at the CCSD/6-311G(d) level.

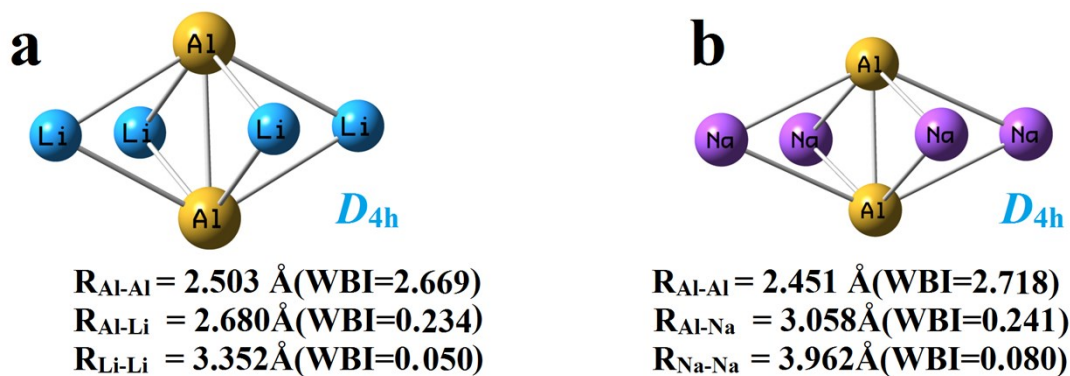

**Figure S1.** Optimized GEM structures together with important bond distances (in/Å) and WBIs of  $D_{4h}\text{-Al}_2\text{Li}_4$  (a), and  $D_{4h}\text{-Al}_2\text{Na}_4$  (b) at the CCSD/6-311G(d) level.

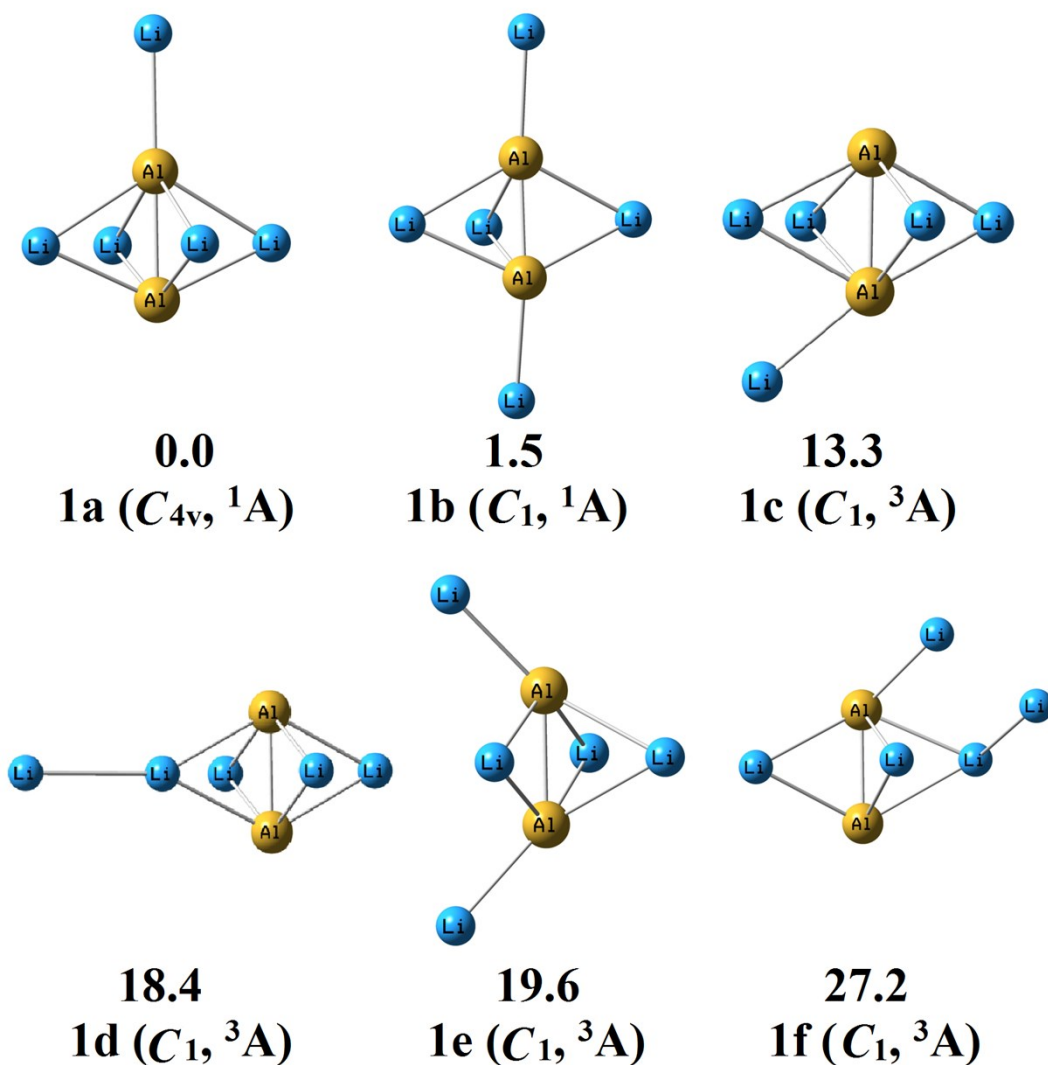

**Figure S2.** The lowest-lying isomers of  $\text{Al}_2\text{Li}_5^+$ . Optimized structures at the B3LYP/def2-TZVP level, relative single-point energies (kcal/mol) at the CCSD/6-311G(d) level.

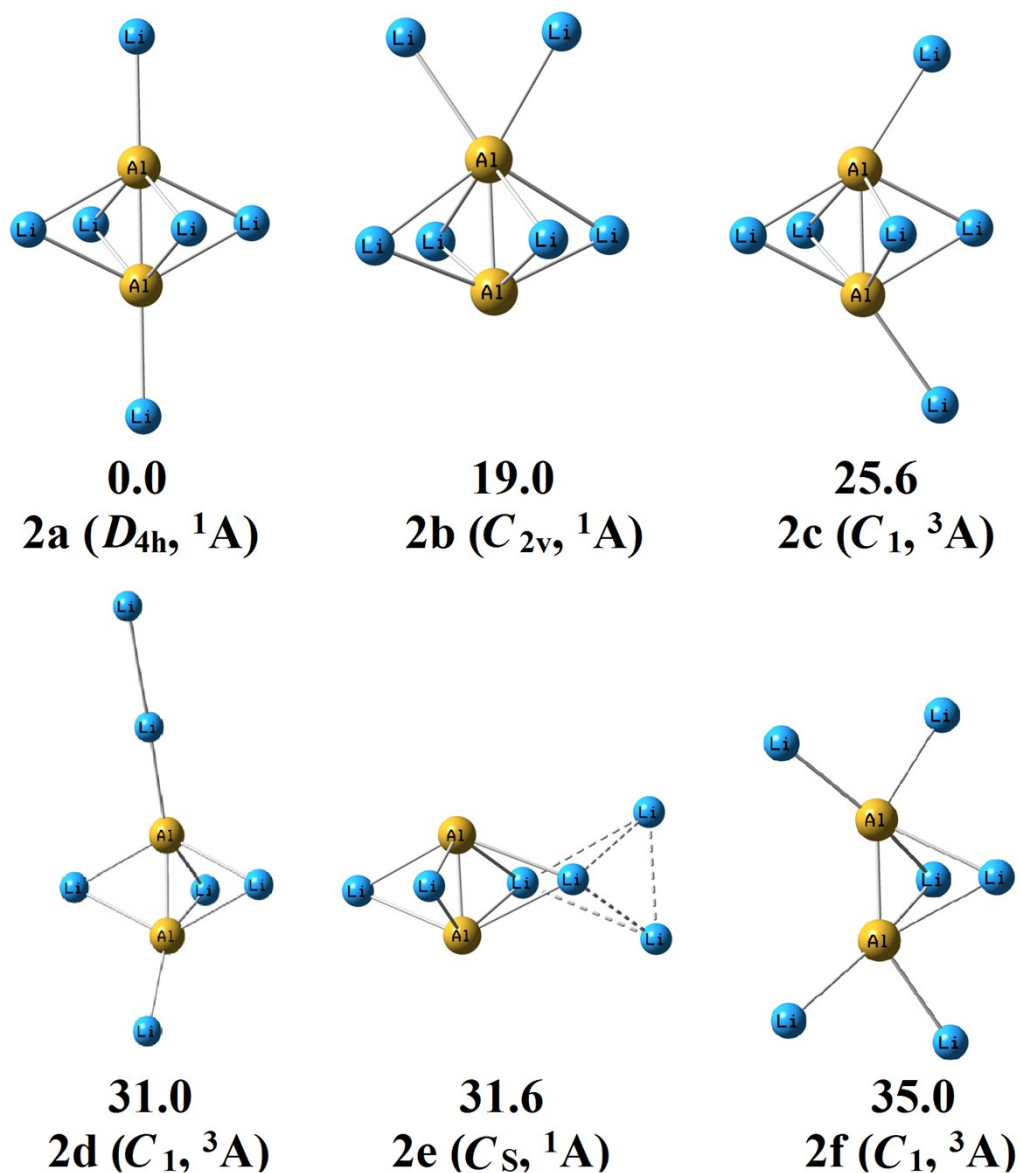

**Figure S3.** The lowest-lying isomers of  $Al_2Li_6^{2+}$ . Optimized structures at the B3LYP/def2-TZVP level, relative single-point energies (kcal/mol) at the CCSD/6-311G(d) level.

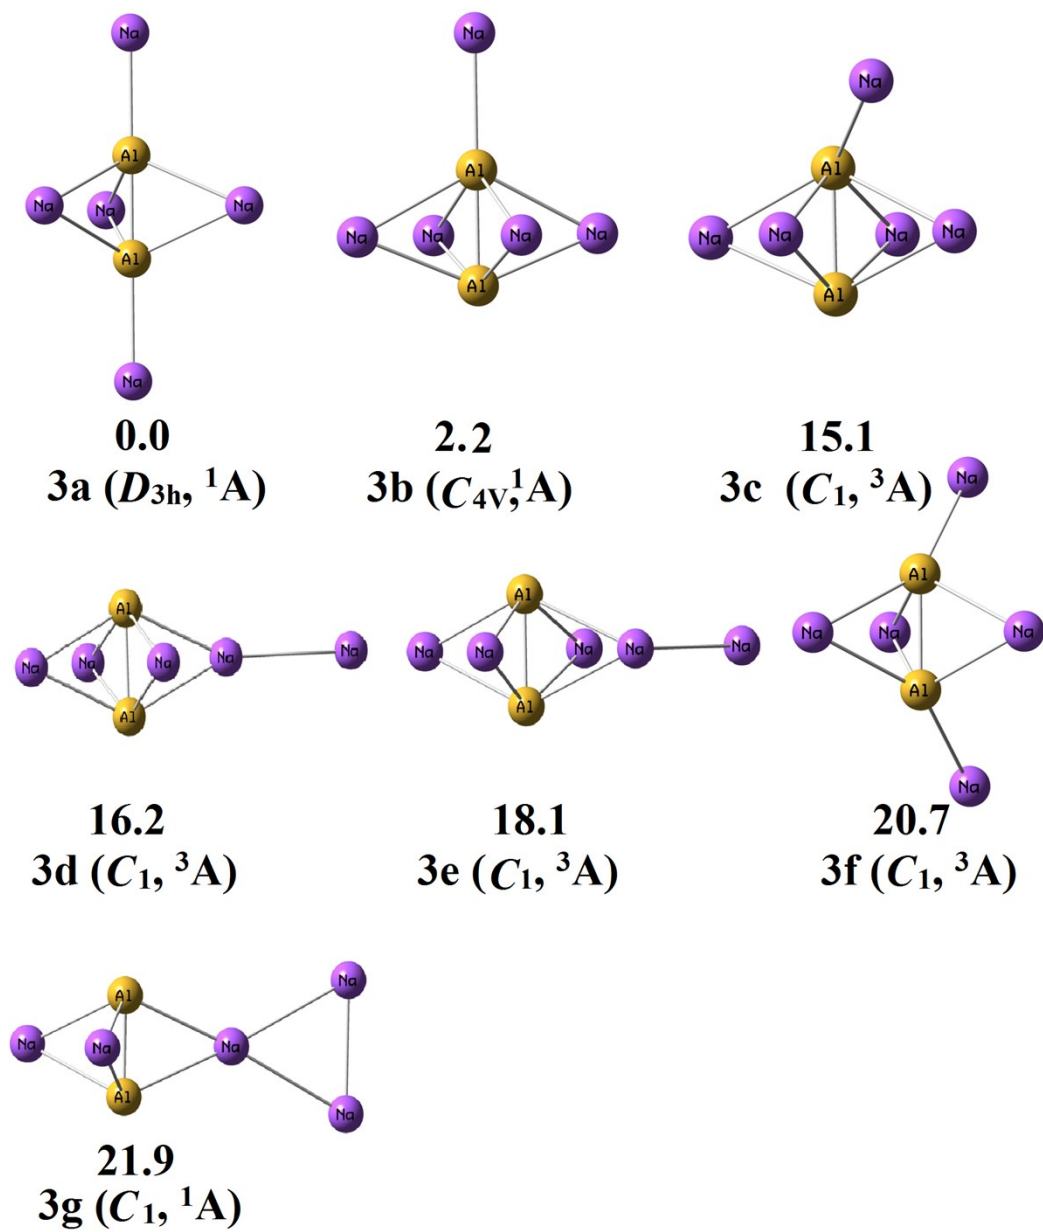

**Figure S4.** The lowest-lying isomers of  $Al_2Na_5^+$ . Optimized structures at the B3LYP/def2-TZVP level, relative single-point energies (kcal/mol) at the CCSD/6-311G(d) level.

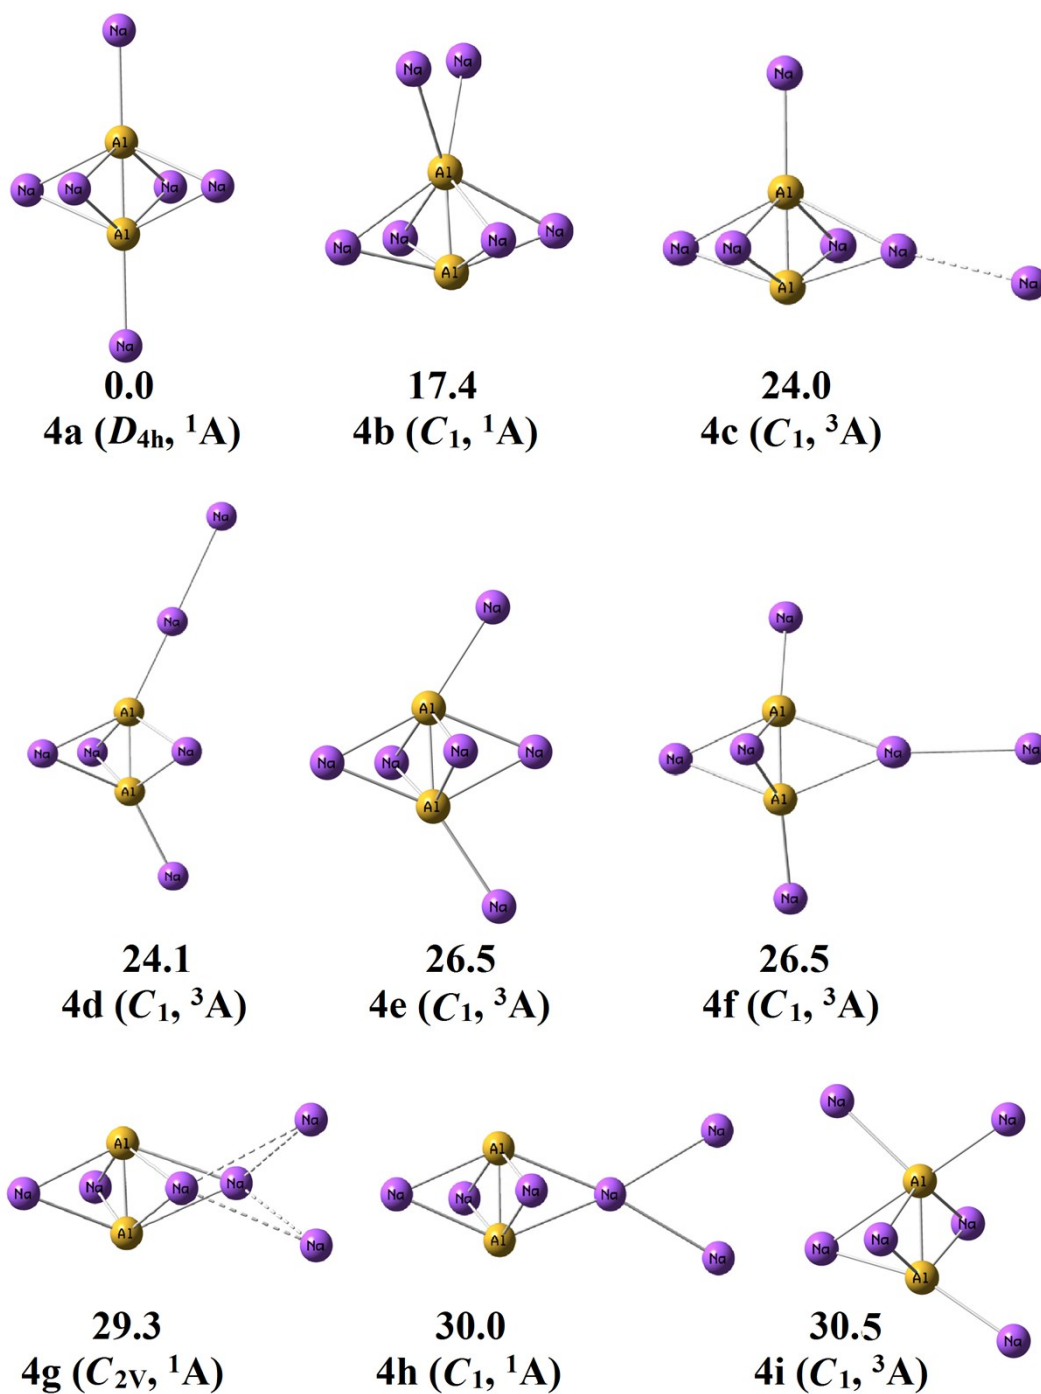

**Figure S5.** The lowest-lying isomers of  $Al_2Na_6^{2+}$ . Optimized structures at the B3LYP/def2-TZVP level, relative single-point energies (kcal/mol) at the CCSD/6-311G(d) level.

**Table S1.** Important results information of the structures of clusters, including the spin states, relative energies (kcal/mol), Al-Al bond length ( $R_{\text{Al-Al}}$ ), Wiberg Bond Indices ( $\text{WBI}_{\text{Al-Al}}$ ) and NPA charge ( $\text{NPA}_{\text{Al-Al}}(|e|)$ ). They all calculated at the B3LYP/def2-TZVP level.

| Molecule-<br>$\text{Al}_2\text{Li}_5^+$ | Spin States | Relative<br>Energies(kcal/mol) | $R_{\text{Al-Al}}(\text{\AA})$ | $\text{WBI}_{\text{Al-Al}}$ | $\text{NPA}_{\text{Al-Al}}( e )$ |
|-----------------------------------------|-------------|--------------------------------|--------------------------------|-----------------------------|----------------------------------|
| I                                       | Singlet     | 0.0                            | 2.52                           | 2.50                        | -1.529                           |
| II                                      | Singlet     | 1.5                            | 2.43                           | 2.76                        | -0.795                           |
| III                                     | Triplet     | 13.3                           | 2.54                           | 1.61                        | -1.031                           |
| IV                                      | Triplet     | 18.4                           | 2.48                           | 1.30                        | -1.199                           |
| V                                       | Triplet     | 19.6                           | 2.54                           | 1.60                        | -1.223                           |
| VI                                      | Triplet     | 27.2                           | 2.49                           | 1.55                        | -0.558                           |

| Molecule-<br>$\text{Al}_2\text{Li}_6^{2+}$ | Spin States | Relative<br>Energies(kcal/mol) | $R_{\text{Al-Al}}(\text{\AA})$ | $\text{WBI}_{\text{Al-Al}}$ | $\text{NPA}_{\text{Al-Al}}( e )$ |
|--------------------------------------------|-------------|--------------------------------|--------------------------------|-----------------------------|----------------------------------|
| I                                          | Singlet     | 0.0                            | 2.45                           | 2.73                        | -1.708                           |
| II                                         | Singlet     | 19.0                           | 2.50                           | 2.29                        | -1.364                           |
| III                                        | Triplet     | 25.6                           | 2.52                           | 1.70                        | -1.340                           |
| IV                                         | Triplet     | 31.0                           | 2.45                           | 2.18                        | -1.111                           |
| V                                          | Singlet     | 31.6                           | 2.36                           | 2.47                        | -0.558                           |
| VI                                         | Triplet     | 35.0                           | 2.48                           | 1.76                        | -1.045                           |

| Molecule-<br>$\text{Al}_2\text{Na}_5^+$ | Spin States | Relative<br>Energies(kcal/mol) | $R_{\text{Al-Al}}(\text{\AA})$ | $\text{WBI}_{\text{Al-Al}}$ | $\text{NPA}_{\text{Al-Al}}( e )$ |
|-----------------------------------------|-------------|--------------------------------|--------------------------------|-----------------------------|----------------------------------|
| I                                       | Singlet     | 0.0                            | 2.44                           | 2.64                        | -1.547                           |
| II                                      | Singlet     | 2.2                            | 2.51                           | 2.29                        | -1.247                           |
| III                                     | Triplet     | 15.1                           | 2.55                           | 1.92                        | -1.034                           |
| IV                                      | Triplet     | 16.2                           | 2.51                           | 2.01                        | -0.932                           |
| V                                       | Triplet     | 18.1                           | 2.53                           | 2.02                        | -0.901                           |
| VI                                      | Triplet     | 20.7                           | 2.54                           | 1.79                        | -1.127                           |
| VI                                      | Singlet     | 21.9                           | 2.42                           | 2.54                        | -0.650                           |



| Molecule-<br>Al <sub>2</sub> Na <sub>6</sub> <sup>2+</sup> | Spin States | Relative<br>Energies(kcal/mol) | R <sub>Al-Al</sub> (Å) | WBI <sub>Al-Al</sub> | NPA <sub>Al-Al</sub> ( e ) |
|------------------------------------------------------------|-------------|--------------------------------|------------------------|----------------------|----------------------------|
| I                                                          | Singlet     | 0.0                            | 2.47                   | 2.55                 | -1.551                     |
| II                                                         | Singlet     | 17.4                           | 2.49                   | 2.40                 | -1.318                     |
| III                                                        | Triplet     | 24.0                           | 2.45                   | 2.35                 | -1.092                     |
| IV                                                         | Triplet     | 24.1                           | 2.48                   | 2.19                 | -1.101                     |
| V                                                          | Triplet     | 26.5                           | 2.56                   | 1.82                 | -1.327                     |
| VI                                                         | Triplet     | 26.5                           | 2.46                   | 2.16                 | -1.087                     |
| VII                                                        | Singlet     | 29.3                           | 2.40                   | 2.68                 | -0.714                     |
| VIII                                                       | Singlet     | 30.0                           | 2.41                   | 2.64                 | -0.716                     |
| IX                                                         | Triplet     | 30.5                           | 2.55                   | 1.80                 | -1.357                     |

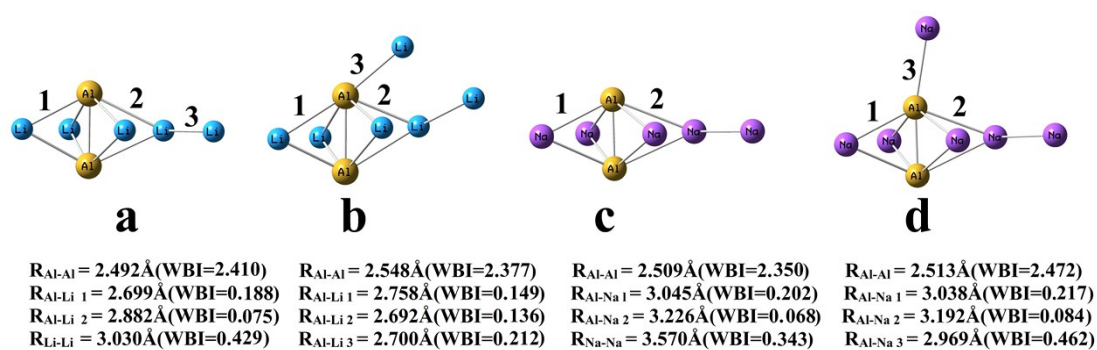

**Figure S6.** Optimized GEM structures at the CCSD/6-311G(d) level for  $C_1$ -Al<sub>2</sub>Li<sub>5</sub> (a),  $C_1$ -Al<sub>2</sub>Li<sub>6</sub> (b),  $C_1$ -Al<sub>2</sub>Na<sub>5</sub> (c) and  $C_1$ -Al<sub>2</sub>Na<sub>6</sub> (d). Together with important bond distances (in/Å) and Wiberg bond indices (WBIs) at the same level.

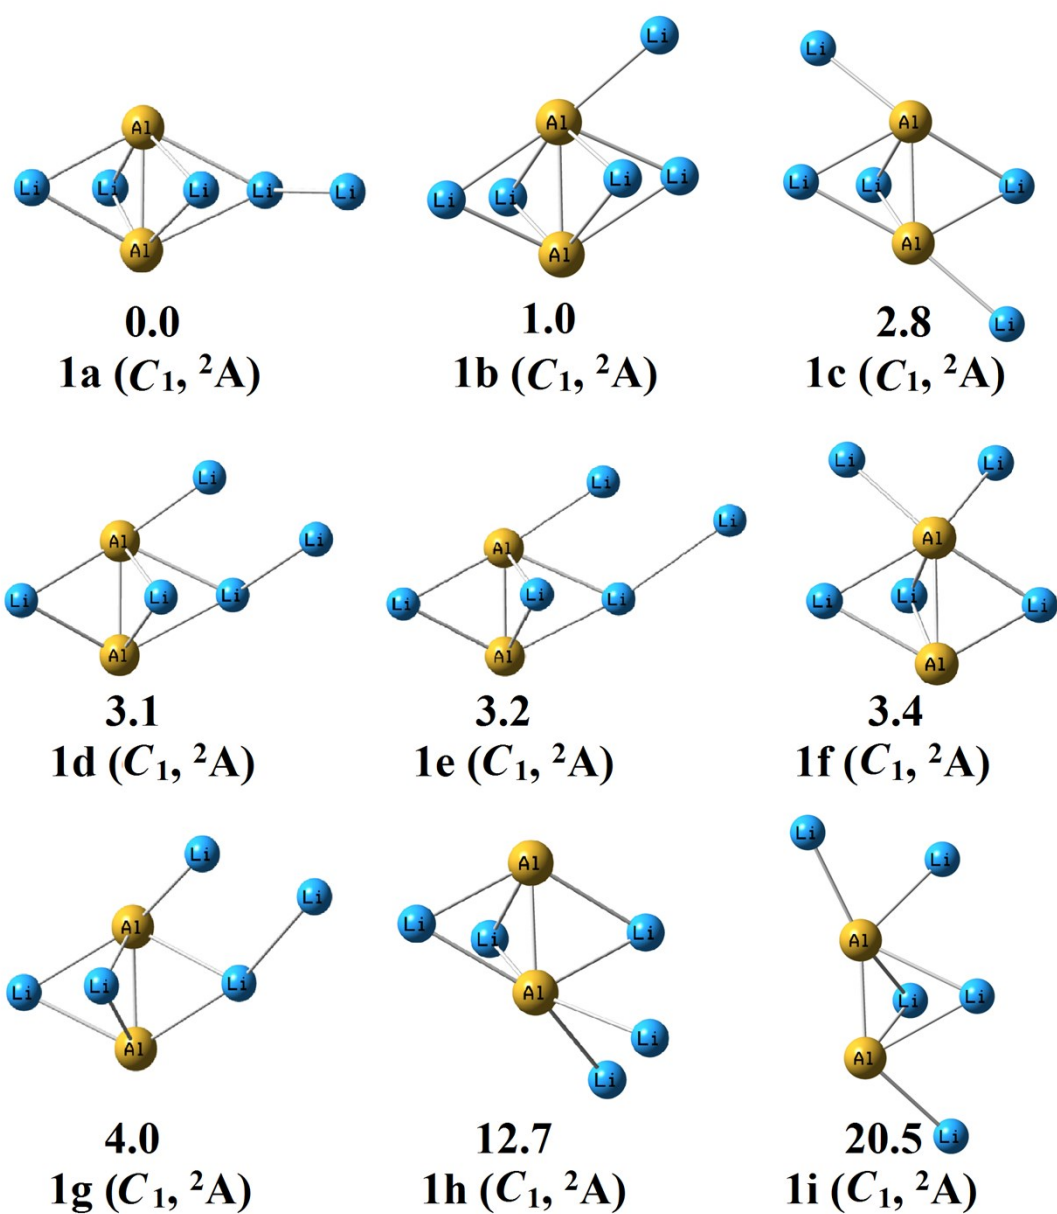

**Figure S7.** The lowest-lying isomers of  $Al_2Li_5$ . Optimized structures at the B3LYP/def2-TZVP level, relative energies (kcal/mol) at the CCSD/6-311G(d) level.

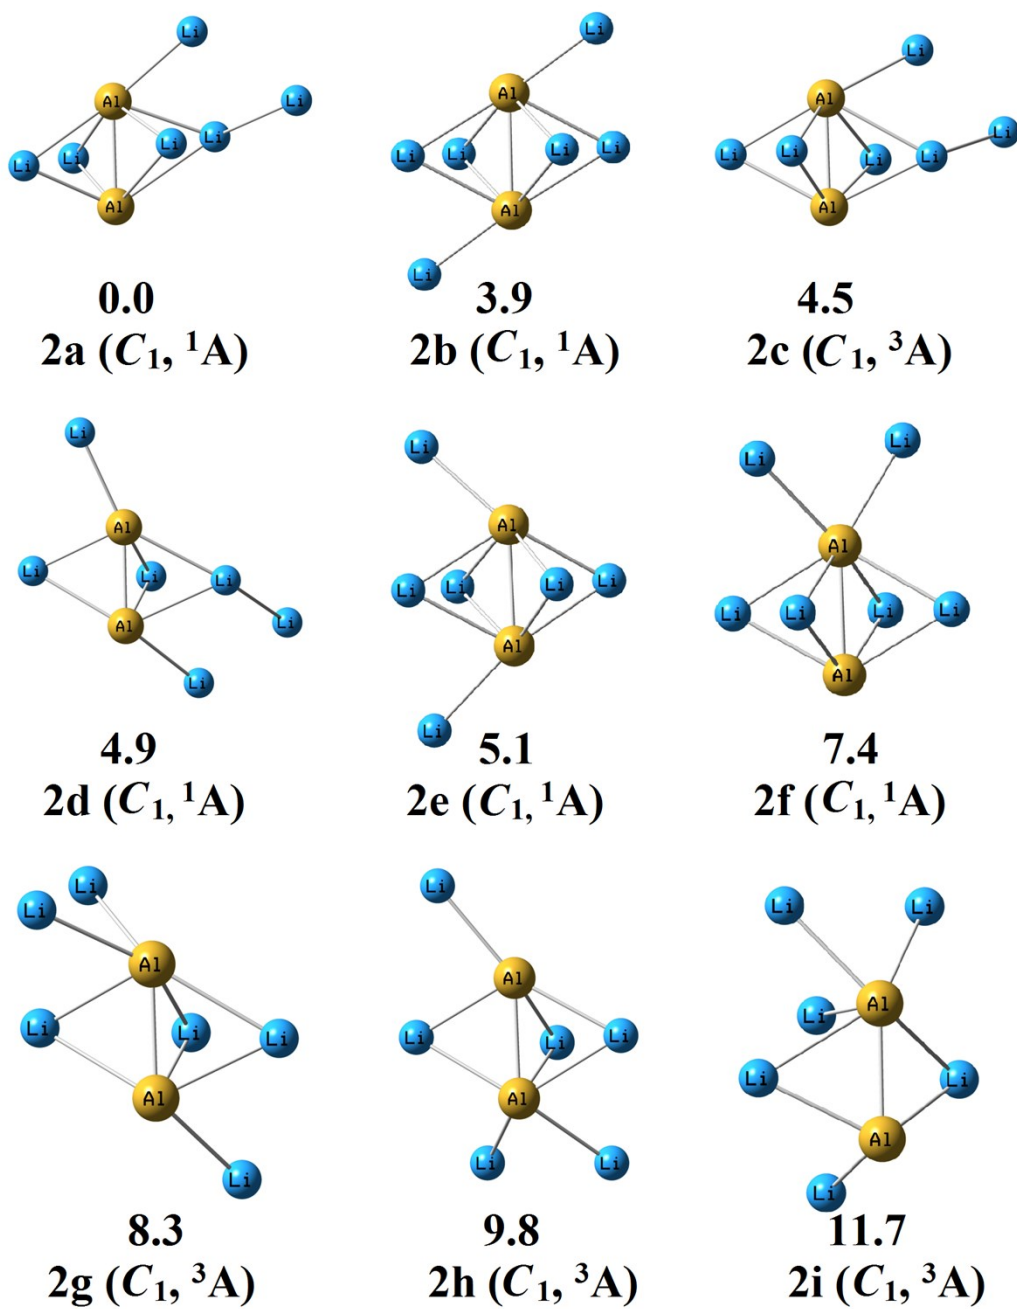

**Figure S8.** The lowest-lying isomers of  $Al_2Li_6$ . Optimized structures at the B3LYP/def2-TZVP level, relative single-point energies (kcal/mol) at the CCSD/6-311G(d) level.

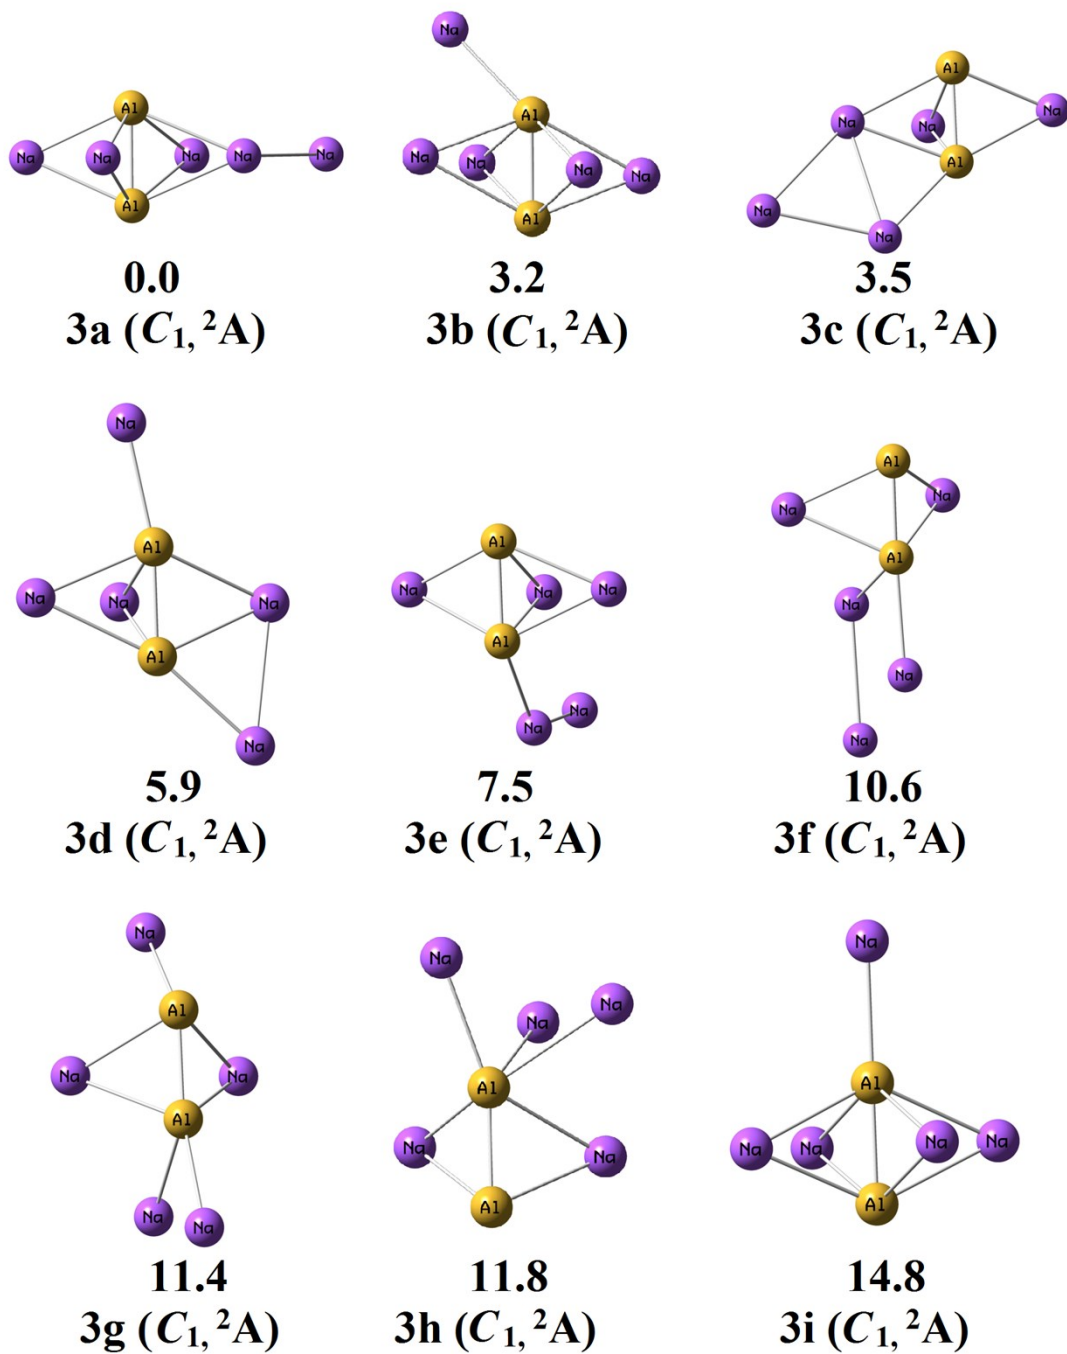

**Figure S9.** The lowest-lying isomers of  $\text{Al}_2\text{Na}_5$ . Optimized structures at the B3LYP/def2-TZVP level, relative single-point energies (kcal/mol) at the CCSD/6-311G(d) level.

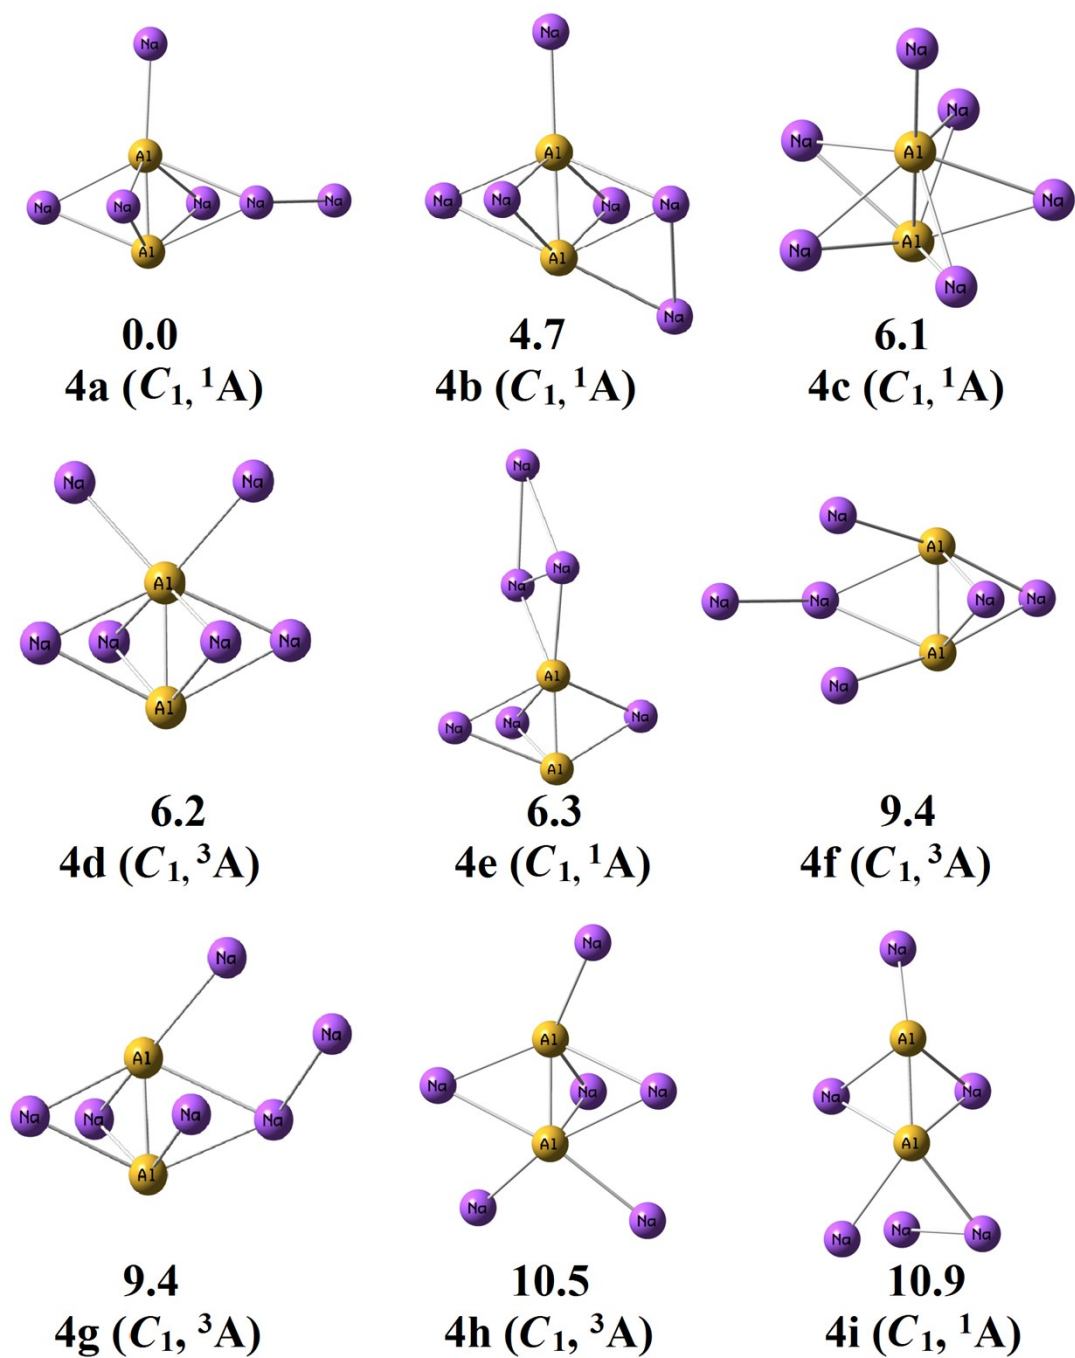

**Figure S10.** The lowest-lying isomers of  $\text{Al}_2\text{Na}_6$ . Optimized structures at the B3LYP/def2-TZVP level, relative single-point energies (kcal/mol) at the CCSD/6-311G(d) level.

**Table S2.** Important results information of the structures of clusters, including the spin states, relative energies (kcal/mol), Al-Al bond length ( $R_{\text{Al-Al}}$ ), Wiberg Bond Indices ( $\text{WBI}_{\text{Al-Al}}$ ) and NPA charge ( $\text{NPA}_{\text{Al-Al}}(|e|)$ ). They all calculated at the B3LYP/def2-TZVP level.

| Molecule-<br>$\text{Al}_2\text{Li}_5$ | Spin States | Relative<br>Energies(Kcal/mol) | $R_{\text{Al-Al}}(\text{\AA})$ | WBI  | $\text{NPA}_{\text{Al-Al}}( e )$ |
|---------------------------------------|-------------|--------------------------------|--------------------------------|------|----------------------------------|
| I                                     | Doublet     | 0.0                            | 2.47                           | 2.41 | -1.172                           |
| II                                    | Doublet     | 1.0                            | 2.57                           | 1.69 | -1.063                           |
| III                                   | Doublet     | 2.8                            | 2.56                           | 1.58 | -1.085                           |
| IV                                    | Doublet     | 3.1                            | 2.45                           | 1.81 | -0.679                           |
| V                                     | Doublet     | 3.2                            | 2.46                           | 1.80 | -0.698                           |
| VI                                    | Doublet     | 3.4                            | 2.67                           | 1.14 | -0.993                           |
| VII                                   | Doublet     | 4.0                            | 2.55                           | 1.60 | -1.010                           |
| VIII                                  | Doublet     | 12.7                           | 2.49                           | 1.58 | -0.982                           |
| IX                                    | Doublet     | 20.5                           | 2.51                           | 1.50 | -0.719                           |

| Molecule-<br>$\text{Al}_2\text{Li}_6$ | Spin States | Relative<br>Energies(Kcal/mol) | $R_{\text{Al-Al}}(\text{\AA})$ | WBI  | $\text{NPA}_{\text{Al-Al}}( e )$ |
|---------------------------------------|-------------|--------------------------------|--------------------------------|------|----------------------------------|
| I                                     | Singlet     | 0.0                            | 2.54                           | 2.38 | -1.548                           |
| II                                    | Singlet     | 3.9                            | 2.71                           | 1.52 | -1.237                           |
| III                                   | Triplet     | 4.5                            | 2.57                           | 1.41 | -0.891                           |
| IV                                    | Singlet     | 4.9                            | 2.45                           | 2.00 | -0.998                           |
| V                                     | Singlet     | 5.1                            | 2.66                           | 1.44 | -1.326                           |
| VI                                    | Singlet     | 7.4                            | 2.70                           | 1.26 | -1.388                           |
| VII                                   | Triplet     | 8.3                            | 2.56                           | 1.39 | -1.069                           |
| VIII                                  | Triplet     | 9.8                            | 2.59                           | 1.37 | -1.189                           |
| IX                                    | Triplet     | 11.7                           | 2.63                           | 1.10 | -0.9569                          |

| Molecule-<br>$\text{Al}_2\text{Na}_5$ | Spin States | Relative<br>Energies(Kcal/mol) | $R_{\text{Al-Al}}(\text{\AA})$ | WBI  | $\text{NPA}_{\text{Al-Al}}( e )$ |
|---------------------------------------|-------------|--------------------------------|--------------------------------|------|----------------------------------|
| I                                     | Doublet     | 0.0                            | 2.52                           | 2.35 | -1.133                           |
| II                                    | Doublet     | 3.2                            | 2.54                           | 1.98 | -1.066                           |
| III                                   | Doublet     | 3.5                            | 2.50                           | 1.89 | -0.805                           |
| IV                                    | Doublet     | 5.9                            | 2.50                           | 1.92 | -1.034                           |
| V                                     | Doublet     | 7.5                            | 2.51                           | 1.86 | -0.793                           |
| VI                                    | Doublet     | 10.6                           | 2.52                           | 1.62 | -0.694                           |
| VII                                   | Doublet     | 11.4                           | 2.51                           | 1.70 | -0.896                           |
| VIII                                  | Doublet     | 11.8                           | 2.57                           | 1.42 | -0.866                           |
| IX                                    | Doublet     | 14.8                           | 2.53                           | 2.13 | -1.116                           |

| Molecule-<br>Al <sub>2</sub> Na <sub>6</sub> | Spin States | Relative<br>Energies(Kcal/mol) | R <sub>Al-Al</sub> (Å) | WBI  | NPA <sub>Al-Al</sub> ( e ) |
|----------------------------------------------|-------------|--------------------------------|------------------------|------|----------------------------|
| I                                            | Singlet     | 0.0                            | 2.53                   | 2.47 | -1.4329                    |
| II                                           | Singlet     | 4.7                            | 2.57                   | 1.94 | -1.1685                    |
| III                                          | Singlet     | 6.1                            | 2.56                   | 1.92 | -1.0862                    |
| IV                                           | Triplet     | 6.2                            | 2.60                   | 1.69 | -1.2637                    |
| V                                            | Singlet     | 6.3                            | 2.54                   | 1.84 | -0.9441                    |
| VI                                           | Triplet     | 9.4                            | 2.56                   | 1.67 | -0.9472                    |
| VII                                          | Triplet     | 9.4                            | 2.52                   | 1.86 | -0.9623                    |
| VIII                                         | Triplet     | 10.5                           | 2.55                   | 1.71 | -1.1620                    |
| IX                                           | Singlet     | 10.9                           | 2.56                   | 1.48 | -0.7725                    |

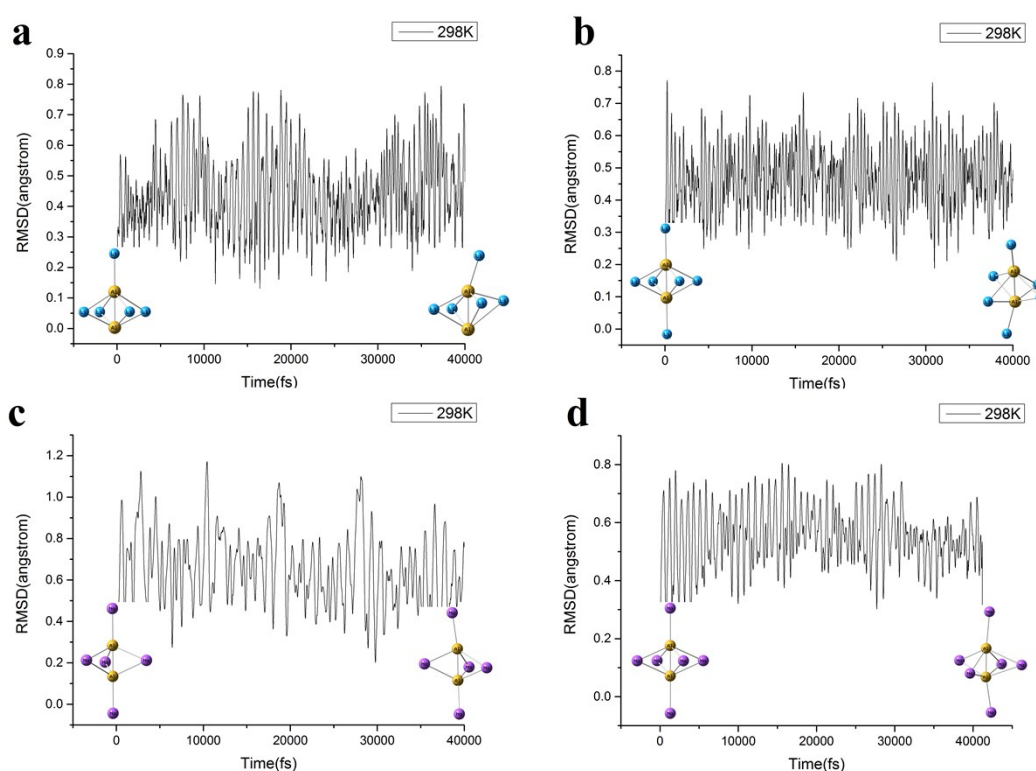

**Figure S11.** Root-mean-square deviations (RMSD) of Al<sub>2</sub>Li<sub>5</sub><sup>+</sup> (a), Al<sub>2</sub>Li<sub>6</sub><sup>2+</sup> (b), Al<sub>2</sub>Na<sub>5</sub><sup>+</sup> (c) and Al<sub>2</sub>Na<sub>6</sub><sup>2+</sup> (d) during Born-Oppenheimer molecular dynamics (BOMD) simulations at 298K. The initial and final structural snapshots are also shown here.

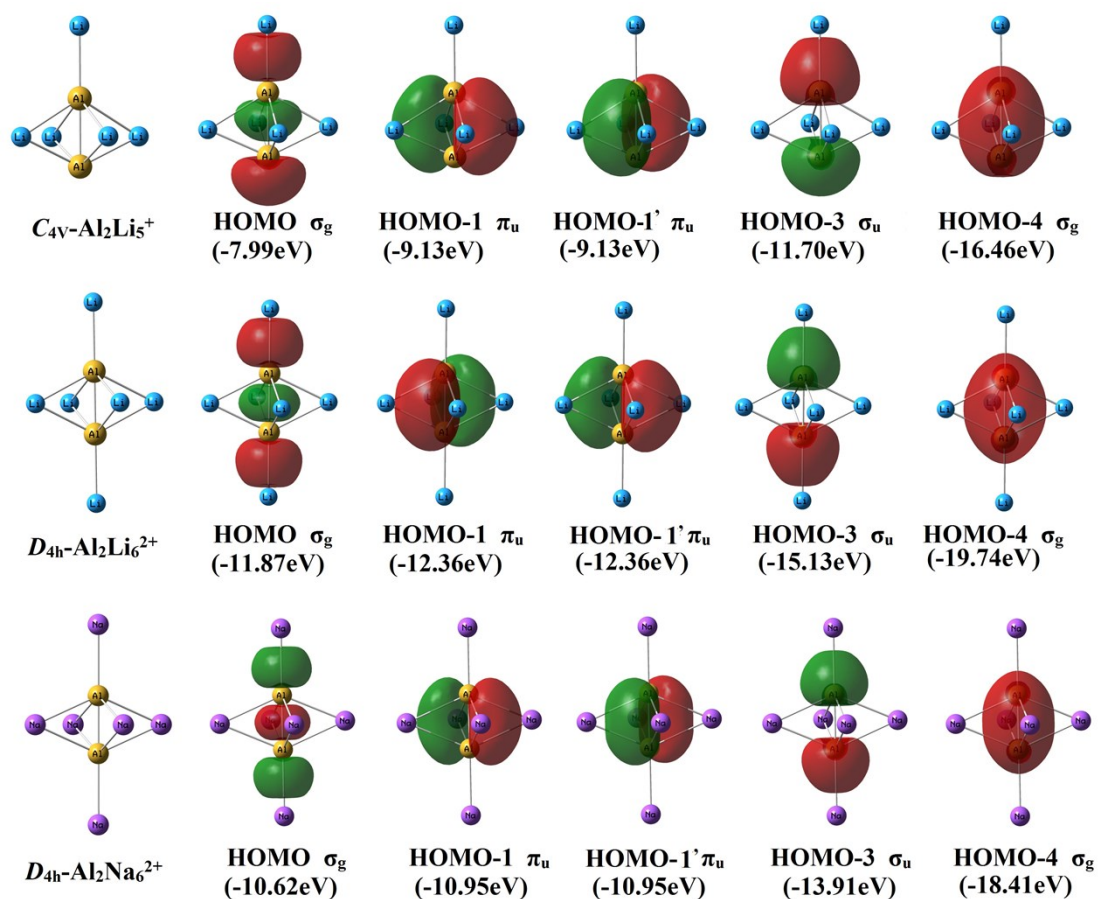

**Figure S12.** The global minimum of  $C_{4v}\text{-Al}_2\text{Li}_5^+$  (a),  $D_{4h}\text{-Al}_2\text{Li}_6^{2+}$  (b) and  $D_{4h}\text{-Al}_2\text{Na}_6^{2+}$  (c) and their important FMOs at the CCSD/6-311G(d) level.



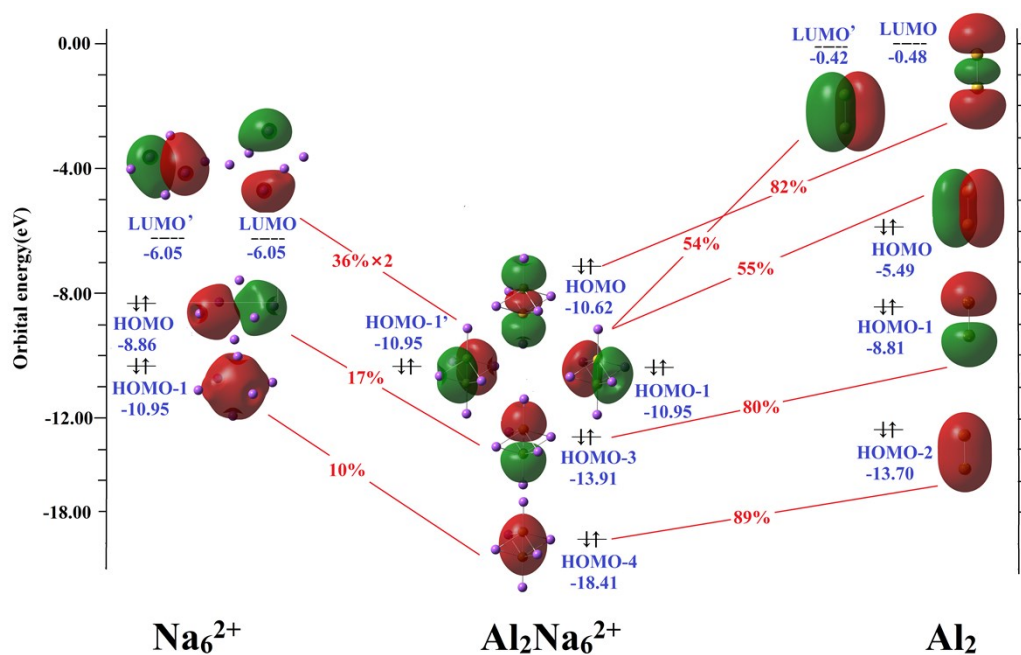

**Figure S13.** The dominant FMO correlation diagram in  $\text{Al}_2\text{Na}_6^{2+}$  between  $\text{Al}_2$  and  $\text{Na}_6^{2+}$  fragments calculated at the CCSD/6-311G(d) level. The horizontal dashed and solid lines represent virtual and occupied molecular orbitals, respectively. (the orbital energies are also given, unit: eV).

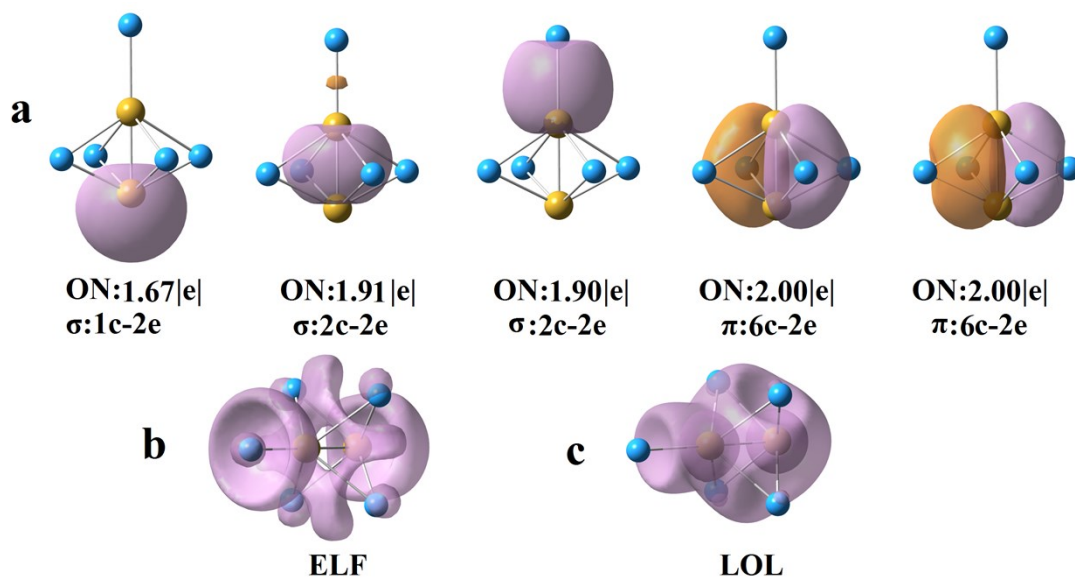

**Figure S14.** a) AdNDP orbitals. b) LOL profile. c) ELF profile for  $\text{Al}_2\text{Li}_5^+$  at the CCSD/6-311G(d) level. ON stands for the occupation number.

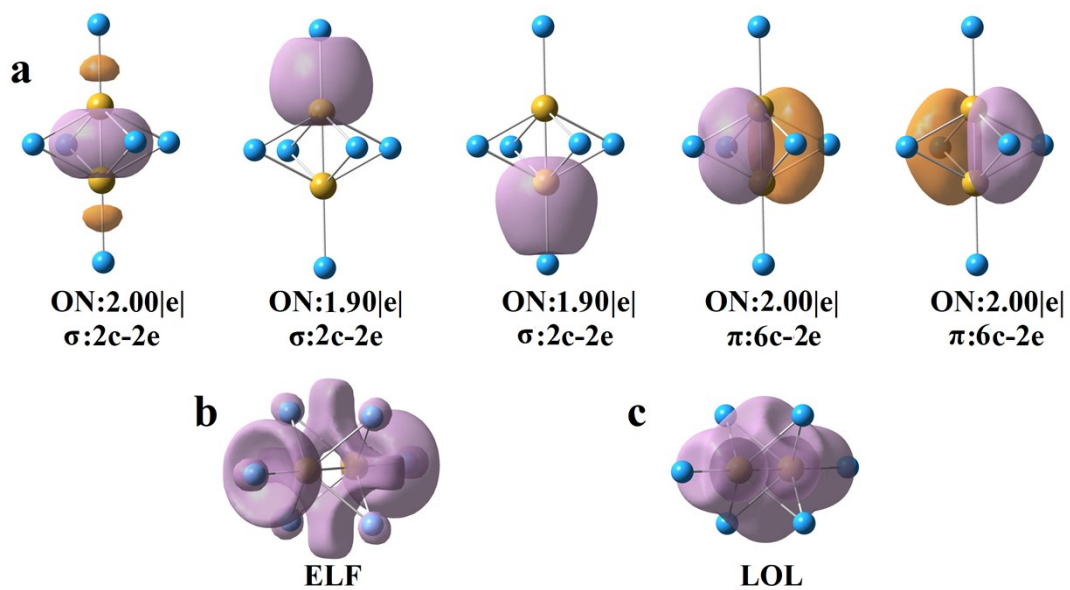

**Figure S15.** a) AdNDP orbitals. b) LOL profile. c) ELF profile for  $\text{Al}_2\text{Li}_6^{2+}$  at the CCSD/6-311G(d) level. ON stands for the occupation number.

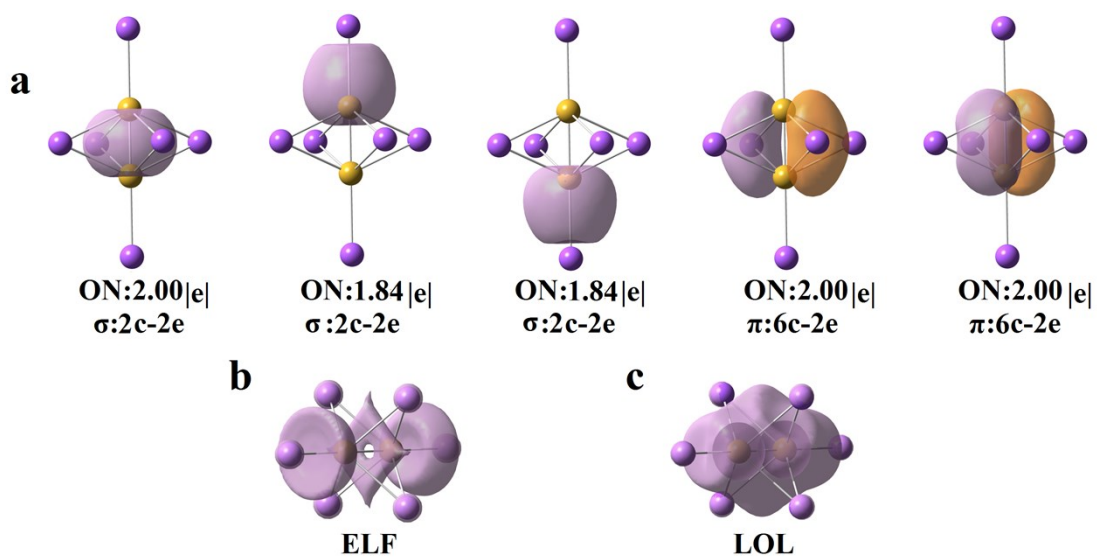

**Figure S16.** a) AdNDP orbitals. b) LOL profile. c) ELF profile for  $\text{Al}_2\text{Na}_6^{2+}$  at the CCSD/6-311G(d) level. ON stands for the occupation number.

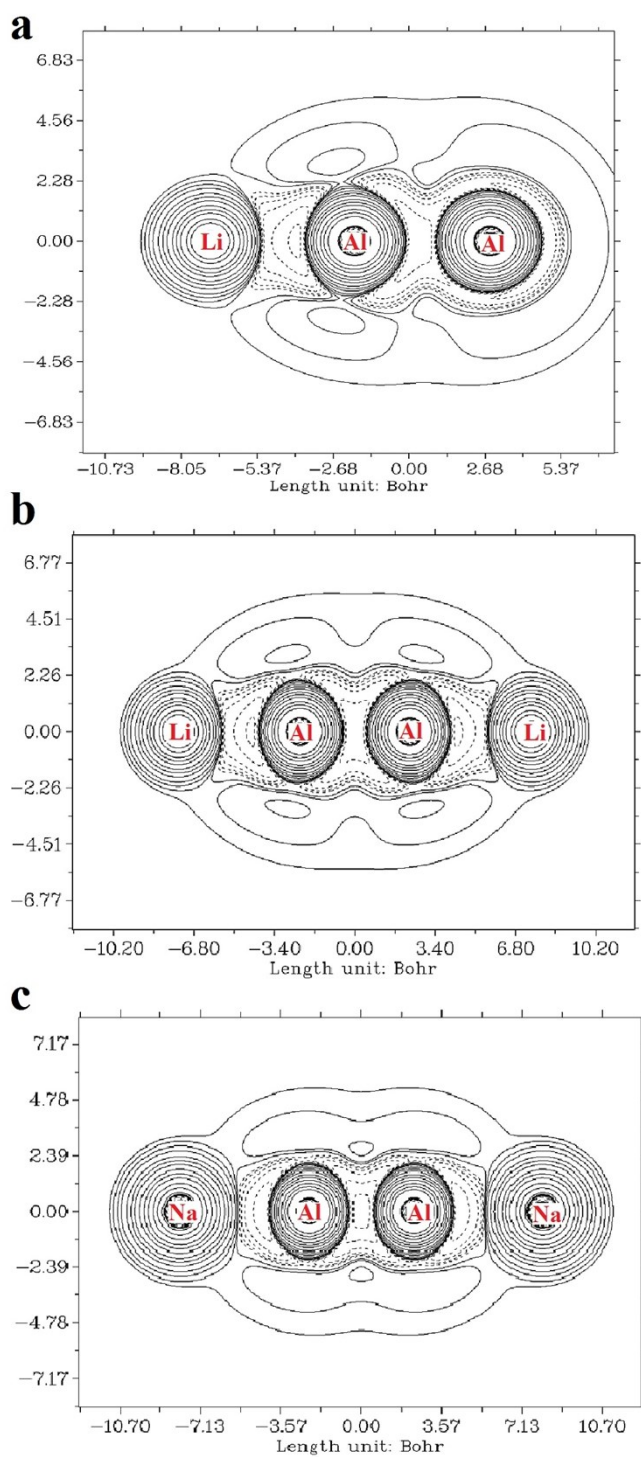

**Figure S17.** Laplacian plot of the electron density  $\nabla^2\rho(r)$ , of  $\text{Al}_2\text{Li}_5^+$ (a),  $\text{Al}_2\text{Li}_6^{2+}$ (b),  $\text{Al}_2\text{Na}_6^{2+}$ (c) in different perspectives. Solid and dashed lines correspond to positive and negative regions of  $\nabla^2\rho$ , respectively.

**Scheme 1.** Several potential reactions and thermodynamic values for the generation of  $C_1\text{-Al}_2\text{Li}_5$ ,  $C_{4V}\text{-Al}_2\text{Li}_5^+$ ,  $C_1\text{-Al}_2\text{Li}_6$ ,  $D_{4h}\text{-Al}_2\text{Li}_6^{2+}$ ,  $C_1\text{-Al}_2\text{Na}_5$ ,  $D_{3h}\text{-Al}_2\text{Na}_5^+$ ,  $C_1\text{-Al}_2\text{Na}_6$  and  $D_{4h}\text{-Al}_2\text{Na}_6^{2+}$ .

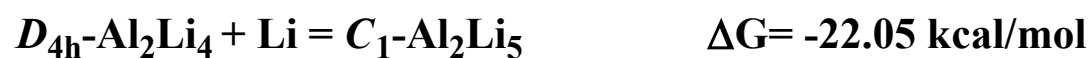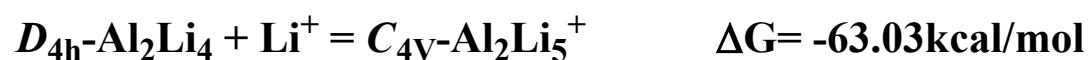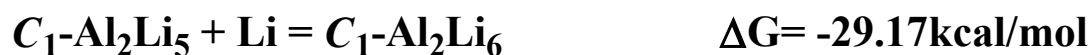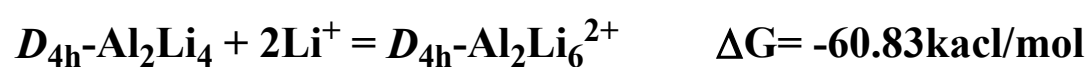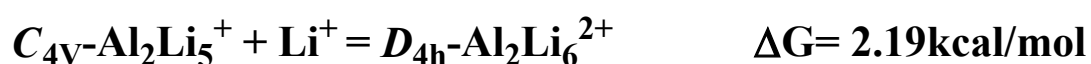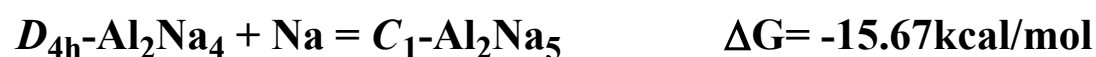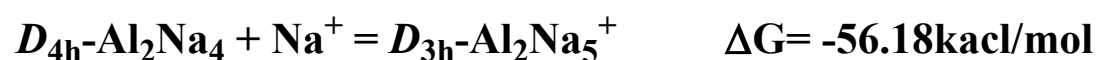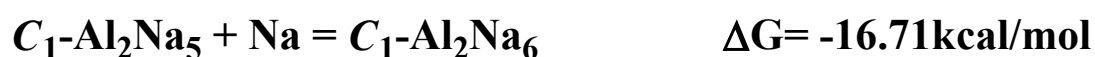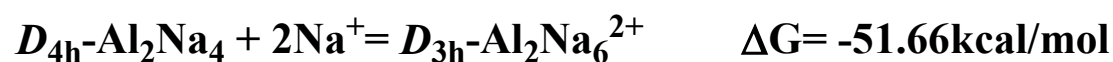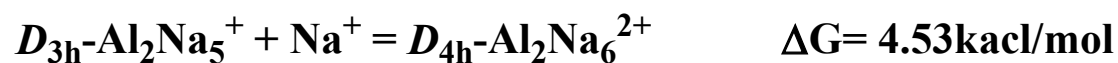

**Table S3.** Cartesian coordinates for optimized structures of  $\text{Al}_2\text{Li}_5^+$ ,  $\text{Al}_2\text{Li}_6^{2+}$ ,  $\text{Al}_2\text{Na}_5^+$ , and  $\text{Al}_2\text{Na}_6^{2+}$  at the CCSD/6-311G(d) level.

**$\text{Al}_2\text{Li}_5^+$  ( $C_{4v}$ ,  $^1\text{A}$ )**

|    |             |             |             |
|----|-------------|-------------|-------------|
| Li | 0.00000000  | 2.42444450  | 0.39986648  |
| Li | 0.00000000  | -2.42444450 | 0.39986648  |
| Li | 0.00000000  | -0.00000000 | -3.71594610 |
| Li | -2.42444450 | -0.00000000 | 0.39986648  |
| Li | 2.42444450  | 0.00000000  | 0.39986648  |
| Al | 0.00000000  | -0.00000000 | -1.02113346 |
| Al | 0.00000000  | 0.00000000  | 1.51055521  |

**$\text{Al}_2\text{Li}_6^{2+}$  ( $D_{4h}$ ,  $^1\text{A}$ )**

|    |             |             |             |
|----|-------------|-------------|-------------|
| Li | -0.00000000 | 2.53027834  | 0.00000000  |
| Li | -2.53027834 | -0.00000000 | 0.00000000  |
| Li | -0.00000000 | -0.00000000 | -3.95040198 |
| Li | 0.00000000  | -0.00000000 | 3.95040198  |
| Li | 2.53027834  | 0.00000000  | 0.00000000  |
| Li | 0.00000000  | -2.53027834 | 0.00000000  |
| Al | 0.00000000  | 0.00000000  | 1.23073334  |
| Al | -0.00000000 | 0.00000000  | -1.23073334 |

**$\text{Al}_2\text{Na}_5^+$  ( $D_{3h}$ ,  $^1\text{A}$ )**

|    |             |             |             |
|----|-------------|-------------|-------------|
| Na | -0.00000000 | 2.79534858  | 0.00000000  |
| Na | 0.00000000  | -0.00000000 | -4.13069466 |
| Na | -2.42084289 | -1.39767429 | 0.00000000  |
| Na | 2.42084289  | -1.39767429 | 0.00000000  |
| Na | 0.00000000  | -0.00000000 | 4.13069466  |
| Al | 0.00000000  | 0.00000000  | 1.21780642  |
| Al | -0.00000000 | 0.00000000  | -1.21780642 |

**$\text{Al}_2\text{Na}_6^{2+}$  ( $D_{4h}$ ,  $^1\text{A}$ )**

|    |             |             |             |
|----|-------------|-------------|-------------|
| Na | 0.00000000  | 0.00000000  | 4.25676351  |
| Na | -2.88787913 | 0.00000000  | -0.00000000 |
| Na | 0.00000000  | 2.88787913  | -0.00000000 |
| Na | 0.00000000  | -2.88787913 | -0.00000000 |
| Na | 2.88787913  | 0.00000000  | -0.00000000 |
| Na | -0.00000000 | 0.00000000  | -4.25676351 |
| Al | 0.00000000  | -0.00000000 | -1.23073033 |
| Al | 0.00000000  | -0.00000000 | 1.23073033  |

**Table S4.** Cartesian coordinates for optimized structures of  $\text{Al}_2\text{Li}_5$ ,  $\text{Al}_2\text{Li}_6$ ,  $\text{Al}_2\text{Na}_5$ , and  $\text{Al}_2\text{Na}_6$  at the CCSD/6-311G(d) level.

|                                                                      |           |           |           |
|----------------------------------------------------------------------|-----------|-----------|-----------|
| <b><math>\text{Al}_2\text{Li}_5</math> (<math>C_1, {}^2A</math>)</b> |           |           |           |
| Li                                                                   | -1.740339 | 0.001070  | -1.362101 |
| Li                                                                   | 2.123506  | -0.001946 | 1.663363  |
| Li                                                                   | -4.469773 | 0.000267  | 0.000118  |
| Li                                                                   | -1.740226 | -0.001222 | 1.361546  |
| Al                                                                   | 0.426721  | -1.237231 | -0.000855 |
| Al                                                                   | 0.427333  | 1.237518  | 0.000513  |
| Li                                                                   | 2.125933  | 0.000588  | -1.661446 |
| <b><math>\text{Al}_2\text{Li}_6</math> (<math>C_1, {}^1A</math>)</b> |           |           |           |
| Li                                                                   | -1.318905 | -0.782612 | -1.412557 |
| Li                                                                   | 2.175948  | 0.669665  | 1.609724  |
| Li                                                                   | 2.176645  | 0.670054  | -1.609066 |
| Li                                                                   | -2.686713 | 1.536697  | -0.000032 |
| Li                                                                   | -4.189791 | -1.230047 | -0.000014 |
| Li                                                                   | -1.318715 | -0.782506 | 1.412696  |
| Al                                                                   | 1.211967  | -1.124332 | -0.000104 |
| Al                                                                   | -0.020845 | 1.105582  | -0.000069 |
| <b><math>\text{Al}_2\text{Na}_5</math> (<math>C_1, {}^2A</math>)</b> |           |           |           |
| Na                                                                   | -1.560299 | -1.675054 | 0.001077  |
| Na                                                                   | 2.857283  | 1.960853  | 0.000726  |
| Na                                                                   | -4.713753 | 0.000281  | -0.000359 |
| Na                                                                   | -1.559958 | 1.673405  | -0.000185 |
| Al                                                                   | 0.894843  | -0.000946 | 1.254129  |
| Al                                                                   | 0.894688  | -0.000418 | -1.254557 |
| Na                                                                   | 2.861826  | -1.957872 | -0.000752 |
| <b><math>\text{Al}_2\text{Na}_6</math> (<math>C_1, {}^1A</math>)</b> |           |           |           |
| Na                                                                   | 1.585168  | -0.448075 | 1.674544  |
| Na                                                                   | 1.586491  | -0.463263 | -1.673604 |
| Na                                                                   | 4.769903  | -0.352065 | 0.001093  |
| Na                                                                   | -0.290169 | 3.637125  | -0.010148 |
| Na                                                                   | -2.823095 | -0.565076 | -1.935132 |
| Na                                                                   | -2.815274 | -0.549277 | 1.943168  |
| Al                                                                   | -0.863198 | 0.723637  | -0.004620 |
| Al                                                                   | -0.840131 | -1.789257 | 0.004687  |
